# 1 Inference based PICRUSt accuracy varies across sample types and 2 functional categories

3 Shan Sun<sup>1</sup>, Roshonda B. Jones<sup>2</sup> and Anthony A. Fodor<sup>1</sup>

4 <sup>1</sup>Department of Bioinformatics and Genomics, University of North Carolina at Charlotte,  
5 Charlotte, North Carolina, USA; <sup>2</sup> The Saban Research Institute, Children's Hospital Los  
6 Angeles, University of Southern California, Los Angeles, California, USA

## 7 8 **Abstract**

9 **Background:** Despite recent decreases in the cost of sequencing, shotgun metagenome  
10 sequencing remains more expensive compared with 16S rRNA amplicon sequencing.  
11 Methods have been developed to predict the functional profiles of microbial communities  
12 based on their taxonomic composition, and PICRUSt is the most widely used of these  
13 techniques. In this study, we evaluated the performance of PICRUSt by comparing the  
14 significance of the differential abundance of functional gene profiles predicted with  
15 PICRUSt to those from shotgun metagenome sequencing across different environments.  
16 **Results:** We selected 7 datasets of human, non-human animal and environmental (soil)  
17 samples that have publicly available 16S rRNA and shotgun metagenome sequences. As  
18 we would expect based on previous literature, strong Spearman correlations were  
19 observed between gene compositions predicted with PICRUSt and measured with  
20 shotgun metagenome sequencing. However, these strong correlations were preserved  
21 even when the sample labels were shuffled. This suggests that simple correlation  
22 coefficient is a highly unreliable measure for the performance of algorithms like  
23 PICRUSt. As an alternative, we compared the performance of PICRUSt predicted genes

24 to metagenome genes in inference models associated with metadata within each dataset.  
25 With this method, we found reasonable performance for human datasets, with PICRUSt  
26 performing better for inference on genes related to “house-keeping” functions. However,  
27 the performance of PICRUSt degraded sharply outside of human datasets when used for  
28 inference.

29 **Conclusion:** We conclude that the utility of PICRUSt for inference with the default  
30 database is likely limited outside of human samples and that development of tools for  
31 gene prediction specific to different non-human and environmental samples is warranted.

32

33 **Key words:** microbiota functional profile prediction, inference, sample type, functional  
34 category

35

## 36 **Introduction**

37 Recent advances in next generation sequencing are revolutionizing our understanding of  
38 complex microbial communities. Amplicon sequencing of marker genes provides  
39 information regarding the phylogenetic diversity and taxonomic composition of  
40 microorganisms present in the environment, while shotgun metagenome sequencing  
41 provides additional information on the relative abundance of functional genes. Although  
42 knowledge of taxonomy and functional genes of microorganisms are both important,  
43 functional genes are more directly related to pathways and therefore are essential for  
44 understanding the roles microorganisms play with regards to different physiological or  
45 ecological outcomes. However, the higher cost of metagenome sequencing hinders its  
46 application in studies consisting of a large number of samples, which are usually

47 necessary in order to ensure adequate statistical power for detecting true differences [1].  
48 Additionally, metagenome sequencing can also be very challenging for low biomass  
49 samples or samples that are dominated by non-microbial DNA [2, 3].

50

51 In order to address this problem, tools have been developed to predict microbial  
52 functional genes from their taxonomic compositions inferred from more cost-effective  
53 amplicon sequencing, including PICRUSt, Tax4Fun and FaproTax [4-6]. Among these  
54 tools, PICRUSt is the most widely used and has been applied in hundreds of projects on  
55 various environments, including human gut [7, 8], murine [9, 10], fish [11], coral [12],  
56 water [13], plant [14], bioreactor [15] and soil [16]. PICRUSt predicts the genes of  
57 organisms without sequenced genomes based on mapping their 16S rRNA genes to  
58 homologous taxa with fully sequenced genomes. The predictions of PICRUSt are  
59 therefore limited by currently available genomes, which are highly biased towards  
60 microorganisms associated with human health and biotechnology use [17].

61

62 In order to gauge the reliability of PICRUSt predictions in different environments and for  
63 different functional categories, we utilized human, non-human animal (gorilla, mouse and  
64 chicken) and environmental (soil) datasets that were sequenced for both 16S rRNA  
65 marker genes and shotgun metagenomes. We compared the predicted functional profiles  
66 from PICRUSt to the functional profiles measured with shotgun metagenome sequencing.  
67 We demonstrated that simple correlations such as Spearman correlation overstate the  
68 accuracy of PICRUSt by not taking into account the low variance of functional profiles  
69 generated from shotgun metagenome sequencing. As an alternative metric, we used

70 PICRUSt results for inference with simple statistical models and found reasonable  
71 performance for human datasets, which presumably reflected the better reference  
72 information we currently have for human genomes, but a sharp decrease in performance  
73 for inference in non-human samples.

74

## 75 **Results**

76 *Spearman correlation is not a reliable measurement for the prediction accuracy of gene*  
77 *contents*

78 In order to test the accuracy of PICRUSt from a range of environments, we compared  
79 PICRUSt predictions to the results of shotgun metagenome sequencing on publicly  
80 available datasets for which both metagenome and 16S rRNA sequences were available  
81 (Table S1). As we would expect from previous literature [4], gene content estimation  
82 from PICRUSt was robustly correlated with gene contents from metagenome sequencing  
83 with Spearman correlations in the range of 0.62 to 0.84 (Fig. 1). For example, in one soil  
84 sample (Fig. 1a), there is a clear correlation between the relative abundance of each gene  
85 from PICRUSt and the relative abundance from metagenome sequencing (Spearman's  
86  $\rho = 0.85$ ). However, if the same comparison is made with the sample labels shuffled,  
87 the correlation that was observed is not substantially impacted (Spearman's  $\rho = 0.84$ )  
88 (Fig. 1b).

89

90 The likely explanation for this observation is that across environments, there is less  
91 variation between metagenome functional profiles of samples than their taxonomic  
92 profiles (Fig. 2), an observation that has been previously made for human samples in the

93 Human Microbiome Project [18]. In the datasets we examined, despite sample labels  
94 being shuffled, the relative abundance of genes from PICRUSt estimates were highly  
95 correlated with the relative abundance of gene estimates from metagenome sequencing,  
96 with correlation coefficients always higher than 0.5. The PICRUSt predictions were often  
97 only marginally higher on the unpermuted data than those with sample labels shuffled,  
98 with perhaps the gorilla dataset as an exception (Fig. 1c). However, even in the gorilla  
99 samples, the difference between Spearman coefficients for permuted and unpermuted  
100 samples was only 0.12. For the 2 soil datasets, the Spearman coefficients for the  
101 unpermuted samples were not significantly different from those for the permuted samples  
102 ( $P = 0.508$  and  $0.794$ ).

103

104 *PICRUSt results for inference showed higher consistency with metagenome sequences in*  
105 *human samples than non-human samples*

106 As an alternative evaluation to Spearman correlation, we compared how PICRUSt's gene  
107 predictions performed in a t-test to genes detected with shotgun metagenome sequencing  
108 in each of our datasets. For this purpose, we formed a null hypothesis for each gene in  
109 each dataset that there is no difference in the mean of that gene's distribution of relative  
110 abundance between the two groups in the dataset. For example, for each of the 5,574  
111 genes detected by both PICRUSt and metagenome sequencing in the Human\_KW dataset,  
112 we used a t-test to generate a P-value for the difference in gene composition between  
113 rural and urban samples. Across all the genes, there was a reasonable correlation  
114 ( $\rho=0.49$ ) of P-values from t-tests run on metagenome sequencing data and those on  
115 PICRUSt data (Fig. 3; top left panel). Unlike our results for Spearman correlation, this

116 rho value is sensitive to sample permutation, as when we repeated this procedure on  
117 permuted data, the correlation between P-values generated from metagenome sequencing  
118 and those from PICRUSt approached zero (Fig. 4). We saw a similarly robust correlation  
119 ( $\rho=0.554$ ) for our Human\_TY dataset evaluating a null hypothesis comparing US and  
120 non-US samples. However, when we extended this analysis to non-human datasets (using  
121 the null hypotheses for each study listed in Table S1), the inference produced by  
122 PICRUSt showed a much lower similarity to inference produced by metagenome  
123 sequencing (Fig. 3).

124

125 In order to ensure that the differences in performance were not due to differences in  
126 sample sizes, we randomly sub-sampled each larger dataset (without replacement) to 10  
127 samples (5 per group) and re-calculated the comparison of P-values between PICRUSt  
128 and metagenome sequencing (Fig. S1). Even at a smaller size, data from the human  
129 studies showed greater concordance than those from other environments. We conclude  
130 that the difference in sample sizes between datasets does not explain the variability of  
131 PICRUSt accuracy between different samples types in our study. Likewise, the effect  
132 sizes of the associations with metadata, measured as  $R^2$  in a PERMANOVA test, were  
133 not substantially higher in human samples (Table S1). It therefore also seems unlikely  
134 that effect size alone can explain the better concordance we observed between inference  
135 results from PICRUSt and metagenome sequencing for human samples.

136

137 In order to further investigate the consistency of PICRUSt and metagenome sequencing,  
138 we next asked how many genes were detected by both methods or by each method

139 individually. For some datasets, such as the Human\_KW dataset, PICRUSt failed to  
140 predict many genes that were detected by metagenome sequencing. For other datasets,  
141 such as the soil datasets, many genes that PICRUSt predicted were not detected in  
142 metagenome sequencing and there were also many genes seen in metagenome  
143 sequencing but not in PICRUSt (Fig. 3). For the chicken dataset with an average  
144 metagenome sequencing depth of 31 million reads/sample and the gorilla dataset of 27  
145 million reads/sample, 23.4% and 26.1% of PICRUSt predicted genes could not be  
146 detected by metagenome sequencing (Fig. 3). In addition, the metagenome sequencing of  
147 the Human\_KW dataset with an average sequencing depth of 10 million reads/sample  
148 detected 13,880 genes and PICRUSt missed 59.8% of them (Fig. 3).

149

#### 150 *PICRUSt performs differently for different functional categories*

151 We next investigated the discrepancy between PICRUSt and metagenome sequencing for  
152 inference in different functional categories (Fig. 5). When comparing the P-values from  
153 PICRUSt data to P-values from metagenome sequencing, there was a lack of significant  
154 correlations in the human gut samples for some categories including Signaling molecules  
155 and interaction, Immune system, Endocrine system, Cell growth and death, Nervous  
156 system, Digestive system, Environmental adaptation, Cardiovascular diseases, Immune  
157 diseases, Substance dependence, Circulatory system, Excretory system and Viral protein  
158 family. PICRUSt appeared to have a closer match to the metagenome sequencing data for  
159 categories such as Folding, sorting and degradation, Translation, Transcription,  
160 Replication and repair, Nucleotide metabolism, Glycan biosynthesis and metabolism,  
161 Drug resistance, Neurodegenerative diseases, Endocrine and metabolic diseases and

162 Aging. For the genes only detected by one method, most of the genes missed by  
163 PICRUSt belong to Environmental Information Processing, Organismal Systems and  
164 Human Diseases, while those associated with Metabolism were more likely predicted  
165 (Fig. S2). Among the genes predicted by PICRUSt but not detected by metagenome  
166 sequencing, most of them belong to Cellular processing and signaling, Signaling  
167 molecules and interaction, Genetic information processing, Substance Dependence and  
168 Viral protein family (Fig. S3).

169

## 170 **Discussion**

171 Microbial community functional profiles are typically of much lower variance compared  
172 to their taxonomic profiles likely because of the large proportions of “core” or  
173 “housekeeping” functions [18-20]. In this study, we showed that this lack of variance in  
174 functional profiles between samples leads to a strong correlation between functional  
175 profiles from metagenome sequencing and those estimated from references with  
176 PICRUSt, even when the sample labels are randomly shuffled (Fig. 1c). We argue that  
177 this result shows that metrics commonly used to measure gene prediction performance,  
178 such as Spearman correlation between gene composition estimated with PICRUSt and  
179 metagenome sequencing, do not give a satisfactory measure of overall accuracy. As an  
180 alternative, we evaluated the performance of PICRUSt at a community level based on  
181 inference from simple statistical models testing the association between genes and  
182 metadata. Unlike simple Spearman correlations, evaluation with inference methods are  
183 highly sensitive to shuffling sample labels (Fig. 4), which indicated that inference  
184 methods are much less affected by the relatively low variance of functional profiles. The



185 inference-based approach also has the advantage of reflecting the common use of  
186 PICRUSt to reveal predicted functional profiles associated with different metadata  
187 categories [11, 12, 21-23]. Incorrect estimation of differential abundance could lead to  
188 false discovery of signature genes, and this concern motivated our approach to determine  
189 the reliability of PICRUSt produced inference in different systems.

190

191 In this study, we selected 7 datasets from different environments which include human,  
192 non-human animal and environmental (soil) samples. With inference methods, we found  
193 that PICRUSt and metagenome sequencing had more consistent assessment from human  
194 datasets than non-human animals or environmental datasets. It is likely that these  
195 differences reflected the bias of genome databases towards human-related  
196 microorganisms. However, PICRUSt still missed a large percentage of genes that were  
197 detected with metagenome sequencing in human samples, and an increase in metagenome  
198 sequencing depth could presumably increase the number of genes that are potentially not  
199 detected by PICRUSt (Fig. 3; Table S1). Likewise, PICRUSt sometimes predicted many  
200 genes not found in metagenome sequencing even in samples with presumably adequate  
201 sequencing depth of millions of reads per sample, which suggested that these additional  
202 genes are likely false predictions.

203

204 As a meta-analysis across multiple studies, there are systemic factors that may influence  
205 the results of this study, including different sample sizes, sequencing designs and effect  
206 sizes of associations with the metadata. We repeated our analysis on subsampled datasets  
207 that were rarified to the number of samples in the smallest dataset that we examined and

208 observed a similar pattern of results with inference more consistent between PICRUSt  
209 and metagenome sequencing for human studies (Fig. S1). This result suggests that  
210 difference in sample size does not explain the better inference performance of PICRUSt  
211 for the human studies. While differences in effect size and experimental design are harder  
212 to control, the human studies did not have an obviously higher effect size than the non-  
213 human studies as measured with a PERMANOVA test (Table S1). It therefore also seems  
214 unlikely that differences in effect sizes of associations with the metadata can explain our  
215 results.

216

217 Our study also examined the performance of PICRUSt for different functional categories.  
218 This approach was motivated by the presumed bias in current genome databases toward  
219 culturable microorganisms [24]. We reasoned that the unculturable state of  
220 microorganisms could be caused by specific requirements for nutrients, temperature, pH,  
221 beneficial interactions with other microbes or extremely slow growth rates [25], which in  
222 turn could lead to bias in gene families in different microorganisms. Likewise, different  
223 microorganisms and genes also have different rates of horizontal gene transfer and the  
224 accuracy of gene content estimation may therefore vary depending on the type of the  
225 genes and microbial groups [26]. We found that PICRUSt performed best for “house-  
226 keeping” functions such as transcription and translation while the accuracy of functions  
227 related to environmental information processing was generally much lower (Fig. 5).  
228 Future algorithms for gene prediction could explicitly incorporate this performance  
229 variance into a confidence score that could give users estimated error rates for prediction  
230 of a given gene family.

231

232 Our analysis suggests that in order to better predict microbial functional profiles in  
233 certain environments, it will be of utility to develop tools specific to that environment.  
234 There have been encouraging examples in the literature of efforts to make environmental  
235 specific databases such as CowPI, a functional inference tool specific to the rumen  
236 microbiome, which had better estimates than PICRUSt when used for predicting  
237 functional profiles in the bovine environment [27]. We can look forward to similar future  
238 refinements in the next generation of these algorithms that will use appropriate reference  
239 databases for an environment and analyze individual functional categories to yield  
240 confidence scores for each prediction.

241

## 242 **Methods**

243 The datasets used in this study include 2 human datasets (named as Human\_KW [28] and  
244 Human\_TY [29] in our study after the initials of their first authors), 1 gorilla [30], 1  
245 mouse [31], 1 chicken [32] and 2 soil datasets Soil\_LWM [33] and Soil\_AAN [34]. Each  
246 dataset has publicly available 16S rRNA and metagenome sequences and is associated  
247 with a two-level categorical metadata. The Human\_KW study compared urban and rural  
248 subjects in China, while US and non-US subjects were compared for the Human\_TY  
249 study. In the gorilla study, the dry and wet seasons were compared while the mouse study  
250 compared community composition of two enterotypes. Lean and fat broiler chicken lines  
251 were compared for the chicken study. For the Soil\_LWM study, Amazon dark earth and  
252 agricultural soil were compared, while forested and deforested soils were compared for  
253 the Soil\_AAN study. Information regarding data locations, sequencing depth, sample

254 sizes and effect sizes (measured as  $R^2$  in the PERMANOVA test with the function  
255 ‘adonis’ in the R package ‘vegan’) for each study are listed in Table S1.  
256  
257 The PICRUSt predictions of the 16S rRNA sequences in the datasets followed the  
258 developer’s instructions [4]. The authors’ metagenome analysis results were used when  
259 available [29, 31, 33, 34], otherwise the raw sequences were analyzed with humann2  
260 following the developer’s instructions [35]. In each dataset, all PICRUSt-predicted gene  
261 families and pathways were compared to those from metagenome sequencing to  
262 determine their discrepancy in the number and types of genes revealed. For genes  
263 detected by both PICRUSt and metagenome sequencing, we used two sets of methods to  
264 evaluate their consistency. In a first set of methods, we analyzed the Spearman  
265 correlation between PICRUSt-predicted gene composition and those from metagenome  
266 sequencing. As a control, we permuted the sample labels 100 times and re-calculated  
267 Spearman correlation between PICRUSt estimates and metagenome sequencing estimates  
268 with sample labels shuffled.  
269  
270 In a second set of methods, we analyzed the consistency of PICRUSt and metagenome  
271 sequencing in the P-values they generated for null hypotheses of no association with  
272 metadata. For this purpose, P-values were produced with a t-test of the 2 distinguishable  
273 groups in each dataset (Table S1). P-values from the t-test were log10 transformed and  
274 multiplied by either 1 or -1 to include the direction of change as indicated below:

275 
$$P\_t = \log_{10}(P) * t / \text{abs}(t)$$

276  $P_t$  is the transformed P-value,  $P$  is the P-value from t test, and  $t$  is the statistic of t-test.  
277 We then estimated the consistency of the log-transformed P-values from PICRUSt and  
278 metagenome sequencing with Spearman's correlation. To determine whether this method  
279 is affected by the low variance of functional profiles, we permuted sample labels of the  
280 metagenome sequencing gene compositions 100 times and re-calculated the log-  
281 transformed P-values and their correlation with the PICRUSt results.

282

283 In order to correct for differences in sample size, each dataset was also subsampled to 5  
284 samples per group to ensure that the different sample sizes of datasets were not unduly  
285 influencing our results. The PICRUSt predictions and metagenome sequencing were also  
286 compared in each of the 48 level 2 functional categories.

287

## 288 **Declarations**

### 289 **Availability of data and material**

290 The datasets analyzed in this study are publicly available with repositories and accession  
291 numbers listed in Table S1. R scripts used in this study are available at Github  
292 ([https://github.com/ssun6/Inference\\_picrust](https://github.com/ssun6/Inference_picrust)). Additional requests and questions can be  
293 addressed to S.S.

### 294 **Competing interests**

295 The authors declare that they have no competing interests.

296

297

298

## 299 References

- 300 1. Button KS, Ioannidis JP, Mokrysz C, Nosek BA, Flint J, Robinson ES, Munafò  
301 MR: Power failure: why small sample size undermines the reliability of  
302 neuroscience. *Nature Reviews Neuroscience* 2013, 14:365.
- 303 2. Jervis-Bardy J, Leong LE, Marri S, Smith RJ, Choo JM, Smith-Vaughan HC,  
304 Nosworthy E, Morris PS, O’Leary S, Rogers GB: Deriving accurate microbiota  
305 profiles from human samples with low bacterial content through post-  
306 sequencing processing of Illumina MiSeq data. *Microbiome* 2015, 3:19.
- 307 3. Minich JJ, Zhu Q, Janssen S, Hendrickson R, Amir A, Vetter R, Hyde J, Doty MM,  
308 Stillwell K, Benardini J: KatharoSeq enables high-throughput microbiome  
309 analysis from low-biomass samples. *MSystems* 2018, 3:e00218-00217.
- 310 4. Langille MGI, Zaneveld J, Caporaso JG, McDonald D, Knights D, Reyes JA,  
311 Clemente JC, Burkepile DE, Vega Thurber RL, Knight R, et al: Predictive  
312 functional profiling of microbial communities using 16S rRNA marker gene  
313 sequences. *Nat Biotech* 2013, 31:814-821.
- 314 5. Aßhauer KP, Wemheuer B, Daniel R, Meinicke P: Tax4Fun: predicting  
315 functional profiles from metagenomic 16S rRNA data. *Bioinformatics* 2015,  
316 31:2882-2884.
- 317 6. Louca S, Parfrey LW, Doebeli M: Decoupling function and taxonomy in the  
318 global ocean microbiome. *Science* 2016, 353:1272-1277.
- 319 7. Gevers D, Kugathasan S, Denson LA, Vázquez-Baeza Y, Van Treuren W, Ren B,  
320 Schwager E, Knights D, Song SJ, Yassour M: The treatment-naïve microbiome  
321 in new-onset Crohn’s disease. *Cell host & microbe* 2014, 15:382-392.
- 322 8. Goodrich JK, Waters JL, Poole AC, Sutter JL, Koren O, Blekhman R, Beaumont  
323 M, Van Treuren W, Knight R, Bell JT: Human genetics shape the gut  
324 microbiome. *Cell* 2014, 159:789-799.
- 325 9. Carmody RN, Gerber GK, Luevano Jr JM, Gatti DM, Somes L, Svenson KL,  
326 Turnbaugh PJ: Diet dominates host genotype in shaping the murine gut  
327 microbiota. *Cell host & microbe* 2015, 17:72-84.
- 328 10. De Palma G, Blennerhassett P, Lu J, Deng Y, Park A, Green W, Denou E, Silva M,  
329 Santacruz A, Sanz Y: Microbiota and host determinants of behavioural  
330 phenotype in maternally separated mice. *Nature communications* 2015,  
331 6:7735.
- 332 11. Bolnick DI, Snowberg LK, Hirsch PE, Lauber CL, Org E, Parks B, Lusi AJ,  
333 Knight R, Caporaso JG, Svanbäck R: Individual diet has sex-dependent effects  
334 on vertebrate gut microbiota. *Nature communications* 2014, 5:ncomms5500.
- 335 12. Ainsworth TD, Krause L, Bridge T, Torda G, Raina J-B, Zakrzewski M, Gates  
336 RD, Padilla-Gamiño JL, Spalding HL, Smith C: The coral core microbiome  
337 identifies rare bacterial taxa as ubiquitous endosymbionts. *The ISME journal*  
338 2015, 9:2261.
- 339 13. Revetta R, Gomez-Alvarez V, Gerke T, Santo Domingo J, Ashbolt N: Changes in  
340 bacterial composition of biofilm in a metropolitan drinking water  
341 distribution system. *Journal of applied microbiology* 2016, 121:294-305.

- 342 14. Zarraonaindia I, Owens SM, Weisenhorn P, West K, Hampton-Marcell J, Lax S,  
343 Bokulich NA, Mills DA, Martin G, Taghavi S: The soil microbiome influences  
344 grapevine-associated microbiota. *MBio* 2015, 6:e02527-02514.
- 345 15. Li X, Sun S, Yuan H, Badgley BD, He Z: Mainstream upflow nitrification-  
346 anammox system with hybrid anaerobic pretreatment: Long-term  
347 performance and microbial community dynamics. *Water research* 2017,  
348 125:298-308.
- 349 16. Ling N, Zhu C, Xue C, Chen H, Duan Y, Peng C, Guo S, Shen Q: Insight into how  
350 organic amendments can shape the soil microbiome in long-term field  
351 experiments as revealed by network analysis. *Soil Biology and Biochemistry*  
352 2016, 99:137-149.
- 353 17. Choi J, Yang F, Stepanauskas R, Cardenas E, Garoutte A, Williams R, Flater J,  
354 Tiedje JM, Hofmockel KS, Gelder B: Strategies to improve reference databases  
355 for soil microbiomes. *The ISME journal* 2017, 11:829.
- 356 18. Huttenhower C, Gevers D, Knight R, Abubucker S, Badger JH, Chinwalla AT,  
357 Creasy HH, Earl AM, FitzGerald MG, Fulton RS: Structure, function and  
358 diversity of the healthy human microbiome. *nature* 2012, 486:207.
- 359 19. Franzosa EA, Hsu T, Sirota-Madi A, Shafquat A, Abu-Ali G, Morgan XC,  
360 Huttenhower C: Sequencing and beyond: integrating molecular 'omics' for  
361 microbial community profiling. *Nature Reviews Microbiology* 2015, 13:360.
- 362 20. Ortiz-Álvarez R, Fierer N, de los Ríos A, Casamayor EO, Barberán A:  
363 Consistent changes in the taxonomic structure and functional attributes of  
364 bacterial communities during primary succession. *The ISME journal* 2018,  
365 12:1658.
- 366 21. David LA, Maurice CF, Carmody RN, Gootenberg DB, Button JE, Wolfe BE, Ling  
367 AV, Devlin AS, Varma Y, Fischbach MA: Diet rapidly and reproducibly alters  
368 the human gut microbiome. *Nature* 2014, 505:559.
- 369 22. Mao S, Zhang M, Liu J, Zhu W: Characterising the bacterial microbiota across  
370 the gastrointestinal tracts of dairy cattle: membership and potential function.  
371 *Scientific reports* 2015, 5:16116.
- 372 23. Loudon AH, Woodhams DC, Parfrey LW, Archer H, Knight R, McKenzie V,  
373 Harris RN: Microbial community dynamics and effect of environmental  
374 microbial reservoirs on red-backed salamanders (*Plethodon cinereus*). *The*  
375 *ISME journal* 2014, 8:830.
- 376 24. Grice EA, Segre JA: The human microbiome: our second genome. *Annual*  
377 *review of genomics and human genetics* 2012, 13:151-170.
- 378 25. Vartoukian SR, Palmer RM, Wade WG: Strategies for culture of  
379 'unculturable' bacteria. *FEMS microbiology letters* 2010, 309:1-7.
- 380 26. Gogarten JP, Townsend JP: Horizontal gene transfer, genome innovation and  
381 evolution. *Nature Reviews Microbiology* 2005, 3:679.
- 382 27. Wilkinson TJ, Huws SA, Edwards JE, Kingston-Smith AH, Siu-Ting K, Hughes  
383 M, Rubino F, Friedersdorff M, Creevey CJ: CowPI: A Rumen Microbiome  
384 Focussed Version of the PICRUSt Functional Inference Software. *Front*  
385 *Microbiol* 2018, 9:1095.
- 386 28. Winglee K, Howard AG, Sha W, Gharaibeh RZ, Liu J, Jin D, Fodor AA, Gordon-  
387 Larsen P: Recent urbanization in China is correlated with a Westernized

- 388 microbiome encoding increased virulence and antibiotic resistance genes.  
389 *Microbiome* 2017, 5:121.
- 390 29. Yatsunenko T, Rey FE, Manary MJ, Trehan I, Dominguez-Bello MG, Contreras  
391 M, Magris M, Hidalgo G, Baldassano RN, Anokhin AP: Human gut microbiome  
392 viewed across age and geography. *nature* 2012, 486:222.
- 393 30. Hicks AL, Lee KJ, Couto-Rodriguez M, Patel J, Sinha R, Guo C, Olson SH,  
394 Seimon A, Seimon TA, Ondzie AU: Gut microbiomes of wild great apes  
395 fluctuate seasonally in response to diet. *Nature communications* 2018, 9:1786.
- 396 31. Wang J, Linnenbrink M, Künzel S, Fernandes R, Nadeau M-J, Rosenstiel P,  
397 Baines JF: Dietary history contributes to enterotype-like clustering and  
398 functional metagenomic content in the intestinal microbiome of wild mice.  
399 *Proceedings of the National Academy of Sciences* 2014:201402342.
- 400 32. Hou Q, Kwok L-Y, Zheng Y, Wang L, Guo Z, Zhang J, Huang W, Wang Y, Leng L,  
401 Li H: Differential fecal microbiota are retained in broiler chicken lines  
402 divergently selected for fatness traits. *Scientific reports* 2016, 6:37376.
- 403 33. Mendes LW, Raaijmakers JM, de Hollander M, Mendes R, Tsai SM: Influence of  
404 resistance breeding in common bean on rhizosphere microbiome  
405 composition and function. *The ISME journal* 2017, 12:212.
- 406 34. Navarrete AA, Tsai SM, Mendes LW, Faust K, de Hollander M, Cassman NA,  
407 Raes J, van Veen JA, Kuramae EE: Soil microbiome responses to the  
408 short-term effects of Amazonian deforestation. *Molecular ecology* 2015,  
409 24:2433-2448.
- 410 35. Franzosa EA, McIver LJ, Rahnavard G, Thompson LR, Schirmer M, Weingart G,  
411 Lipson KS, Knight R, Caporaso JG, Segata N: Species-level functional profiling  
412 of metagenomes and metatranscriptomes. *Nature methods* 2018, 15:962.
- 413

414 Fig. 1. Spearman correlations between PICRUSt and shotgun metagenome sequencing in  
415 unpermuted and permuted datasets. **A** and **B**: An example showing the correlations  
416 between genes relative abundances estimated by PICRUSt and metagenome sequencing  
417 in a soil sample (sample BulkAG3 in soil\_AAN dataset) for unpermuted (**A**) and  
418 permuted (**B**) sample labels. **C**: Comparison of Spearman's rho between PICRUSt and  
419 metagenome sequencing in unpermuted (red) and permuted data (blue) in all datasets. In  
420 each of the 100 permutations, all sample labels were shuffled for every gene.

421



422 Fig. 2. Taxonomic (**A**) and functional profiles (**B**) of the 7 datasets in our study. The  
423 taxonomic profiles were plotted at the class level and the functional profiles were plotted  
424 at the broadest functional category of the KEGG database for visualization.

425

426 Fig. 3. Comparison of inferences based on gene composition estimated with PICRUSt  
427 and metagenome sequencing in each of the 7 datasets. The Venn diagrams (left in each  
428 panel) show the number of genes detected by both PICRUSt and metagenome sequencing  
429 or by only one method, with those detected by PICRUSt in pink and those by  
430 metagenome sequencing in blue. The plots (right in each panel) show log-transformed P-  
431 values of the t-test evaluating the null hypothesis for each dataset (see methods and Table  
432 S1) from metagenome sequencing (x-axis) and PICRUSt (y-axis) for genes in common  
433 between the two methods. The sign of the log-transformed P-values reflect the direction  
434 of change (see methods). For example, in the Human\_KW dataset, genes higher in urban  
435 subjects are in the upper-right hand quadrant and genes lower in urban are in the lower-  
436 right hand quadrant. The table (inset lower right corner) shows the percentage of genes  
437 called by only one method for each dataset and the coefficients of Spearman's  
438 correlations between log-transformed P-values based on gene composition estimated by  
439 PICRUSt and metagenome sequencing.

440

441 Fig. 4. The results of inference methods in unpermuted and permuted datasets. The red  
442 points are the Spearman's rho of log-transformed P-values from PICRUSt and  
443 unpermuted metagenome sequencing data for each dataset. The boxplots of blue points  
444 show the Spearman's rho of log-tranformed P-values from PICRUSt and permuted

445 metagenome sequencing data in 100 permutations. In each of the 100 permutations, all  
446 sample labels were shuffled for every gene.

447

448 Fig. 5. Spearman's rho of the correlations between log-transformed P-values from  
449 PICRUSt and metagenome sequencing in 48 KEGG functional categories at the second  
450 hierarchy level with the bar colors indicating the functional categories at the first  
451 hierarchy level.

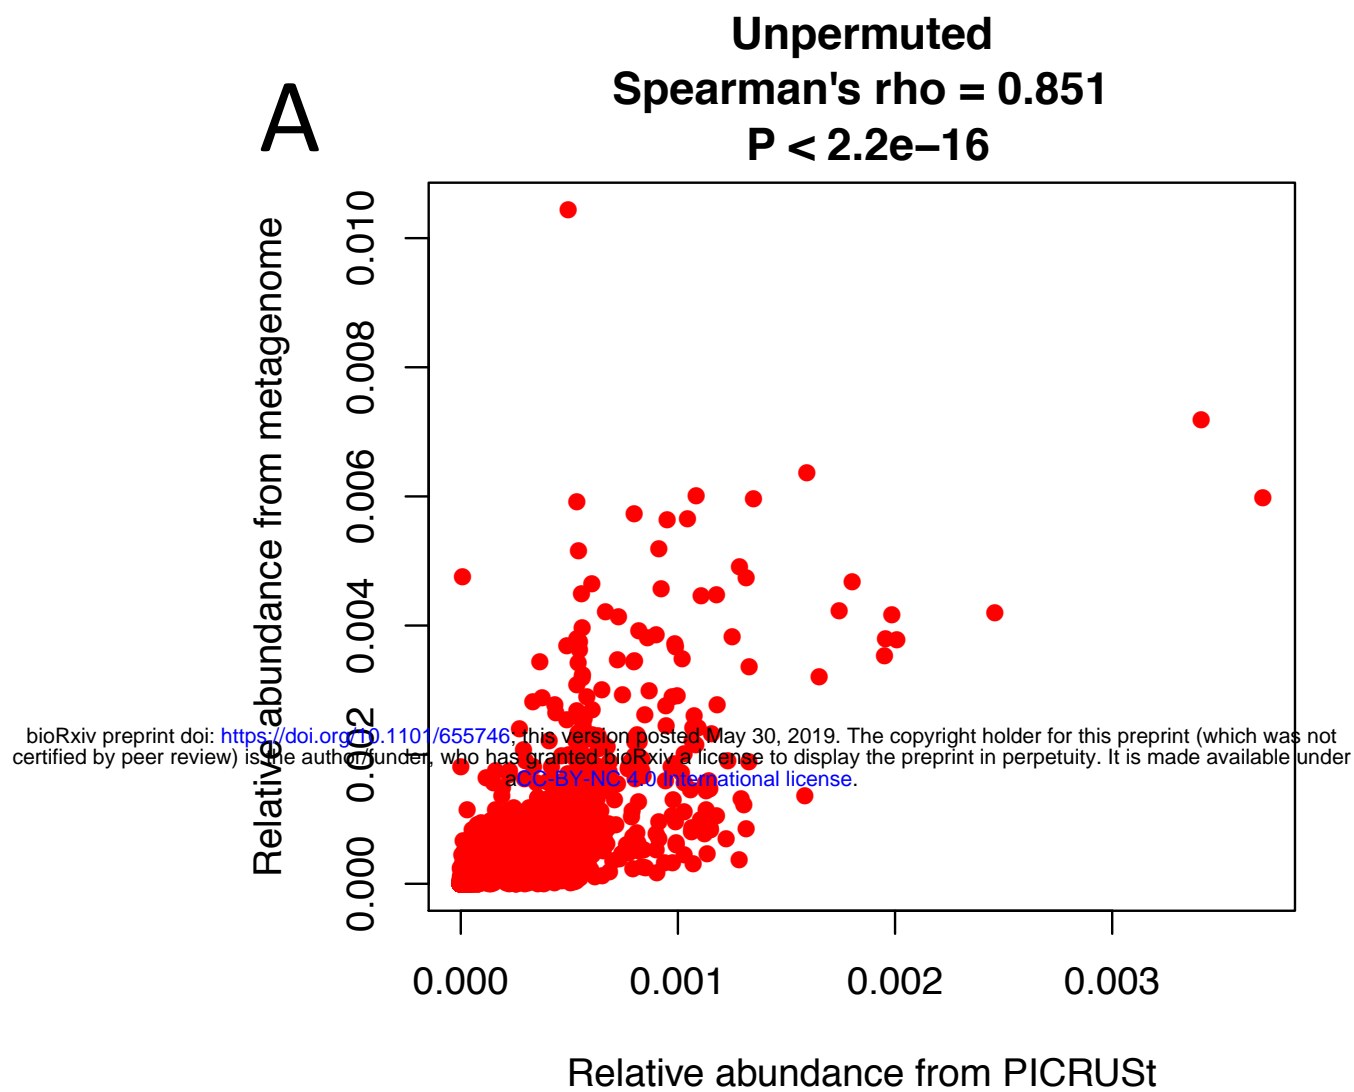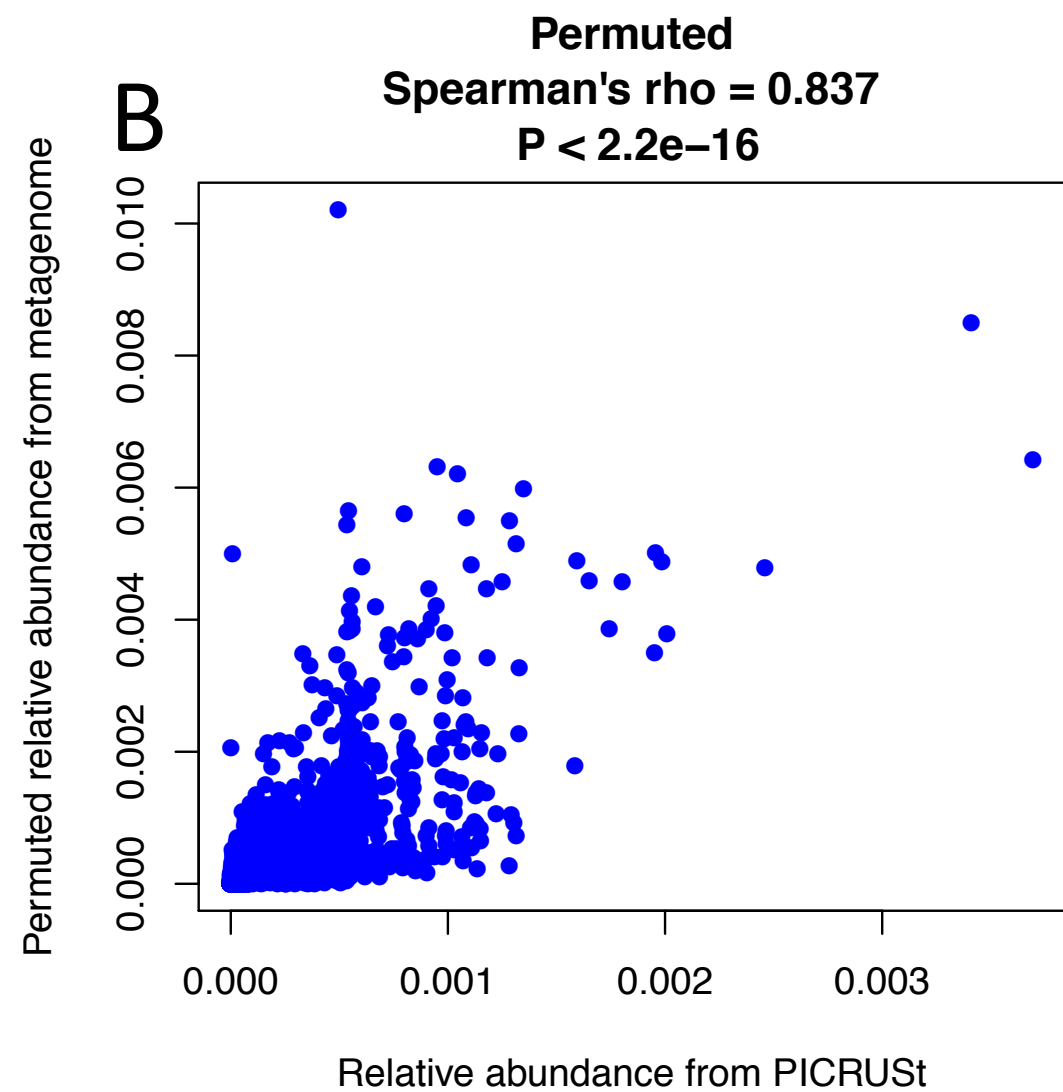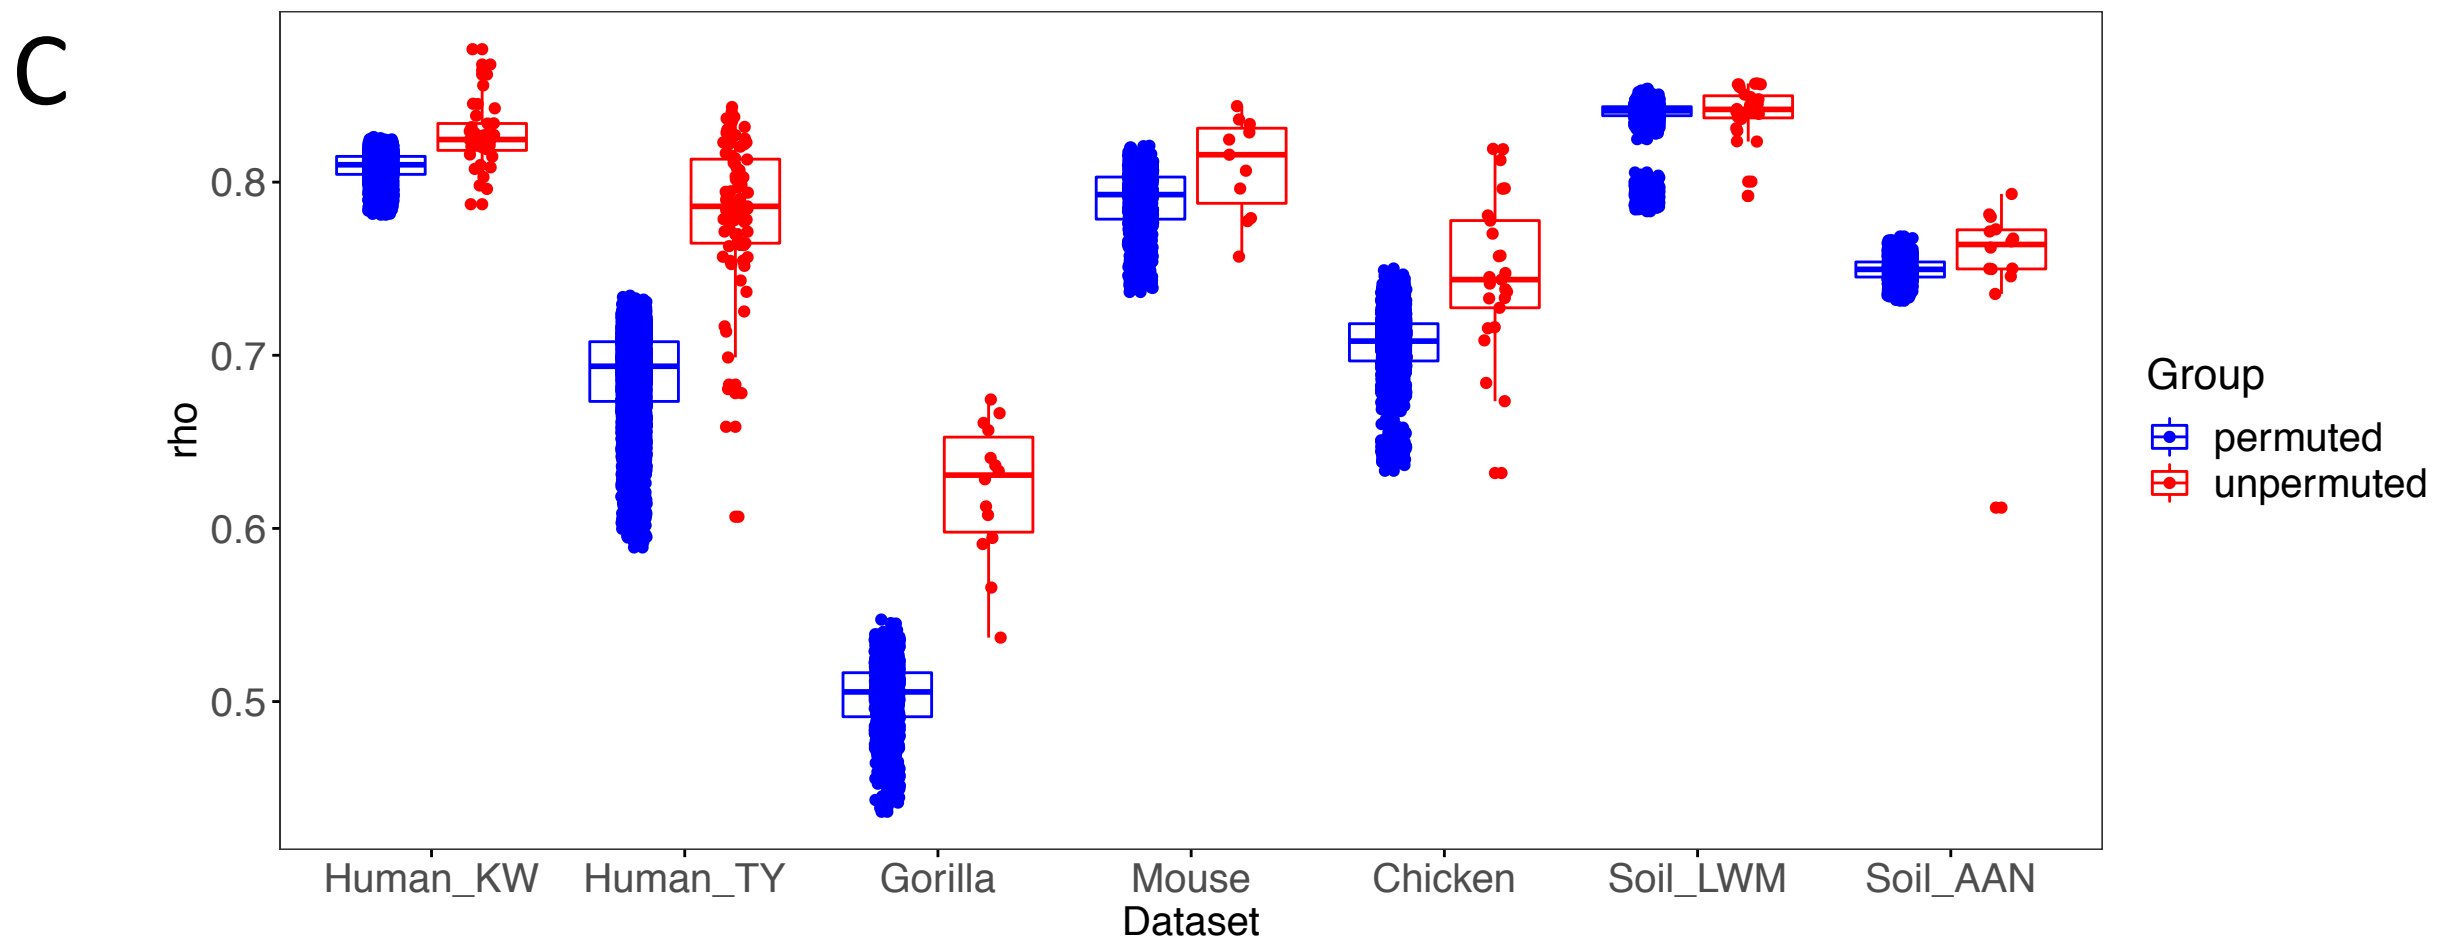

Mean of the Spearman's rho (unpermuted)

0.827 0.782 0.622 0.809 0.747 0.840 0.753

Mean of the Spearman's rho (permuted)

0.809 0.688 0.503 0.789 0.706 0.838 0.750

P-value of the difference between the 2 sets of rho

4.41E-07 < 2.2e-16 4.6E-08 0.0435 0.000142 0.505 0.794

A

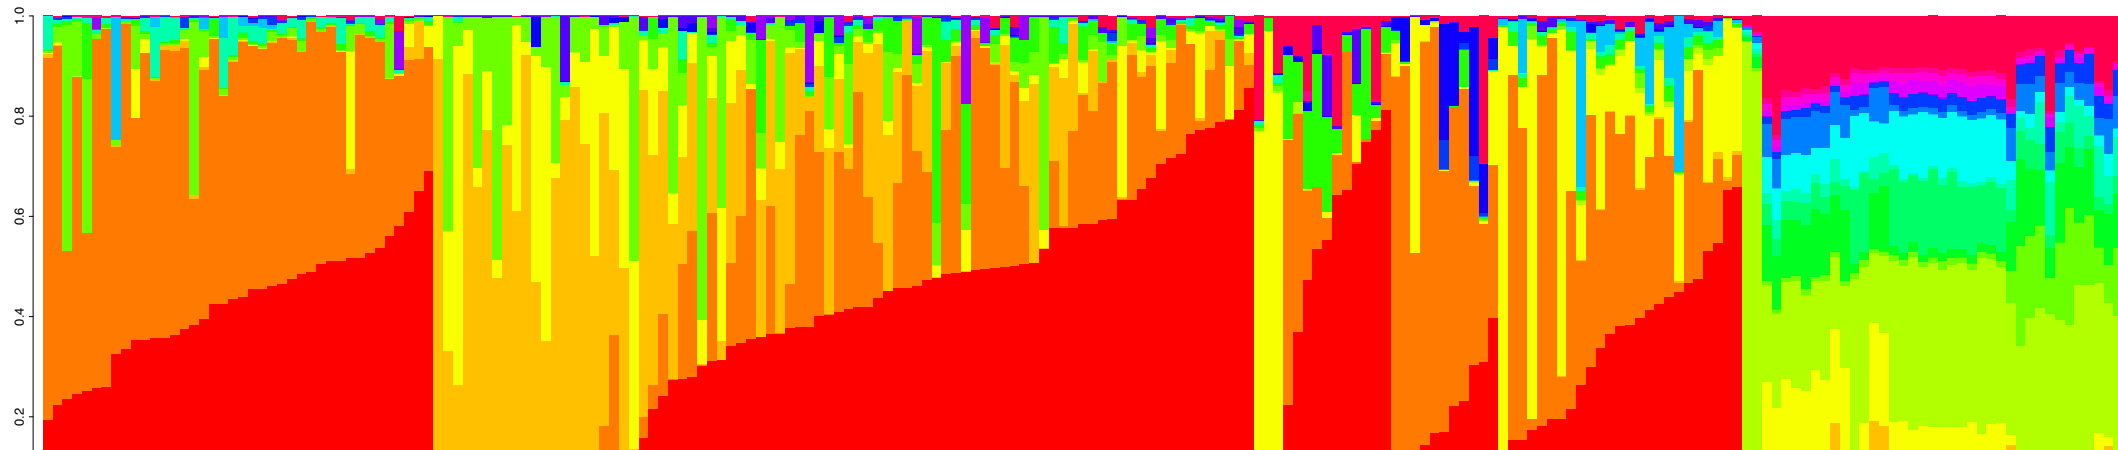

- Other
- Planctomycetia
- Acidimicrobiia
- Acidobacteria-6
- Verrucomicrobiae
- Coriobacteria
- Epsilonproteobacteria
- Deltaproteobacteria
- Solibacteres
- Fusobacteriia
- Thermoleophila
- Betaproteobacteria
- [Spartobacteria]
- Acidobacteriia
- Erysipelotrichi
- Gammaproteobacteria
- Alphaproteobacteria
- Bacilli
- Actinobacteria
- Bacteroidia
- Clostridia

B

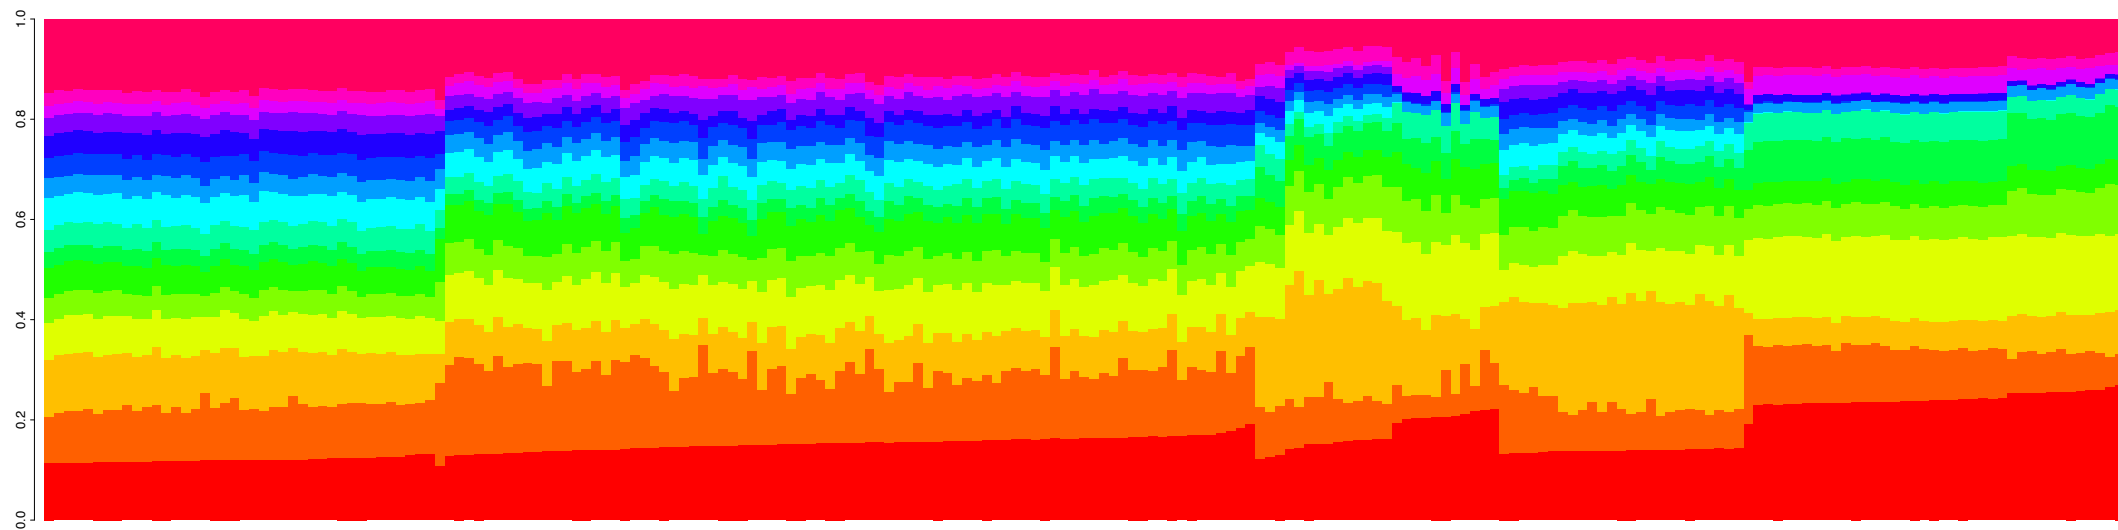

- Other
- 09123 Folding, sorting and degradation
- 09103 Lipid metabolism
- 09193 Cellular processes and signaling
- 09121 Transcription
- 09191 Metabolism
- 09112 Enzyme families
- 09194 Poorly characterized
- 09108 Metabolism of cofactors and vitamins
- 09102 Energy metabolism
- 09124 Replication and repair
- 09104 Nucleotide metabolism
- 09105 Amino acid metabolism
- 09122 Translation
- 09131 Membrane transport
- 09101 Carbohydrate metabolism

Human\_KW

Human\_TY

Gorilla

Mouse

Chicken

Soil\_LWM

Soil\_AAN

### Human\_KW

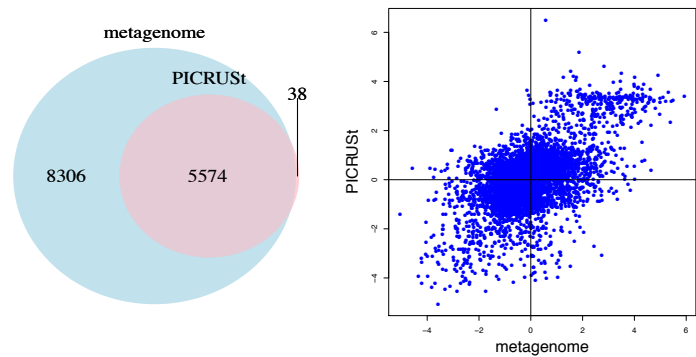

### Human\_TY

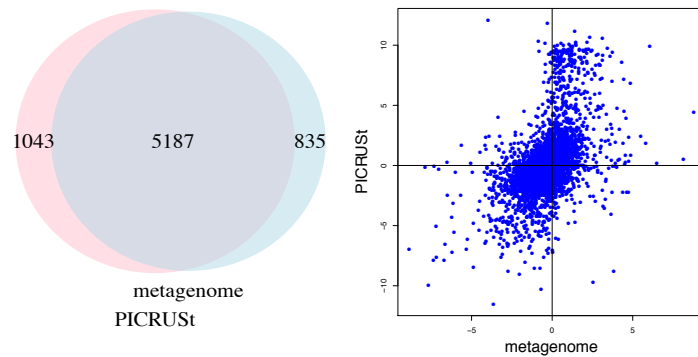

### Gorilla

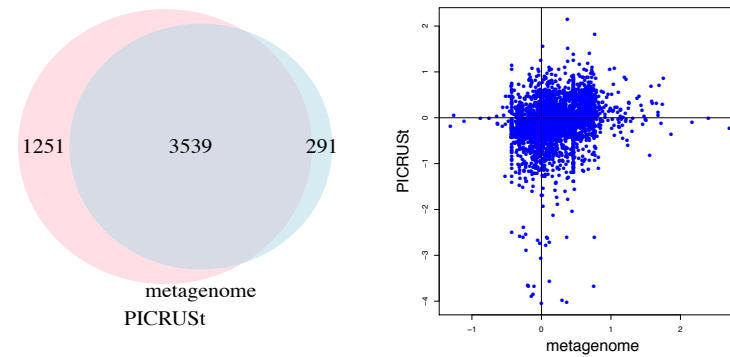

### Mouse

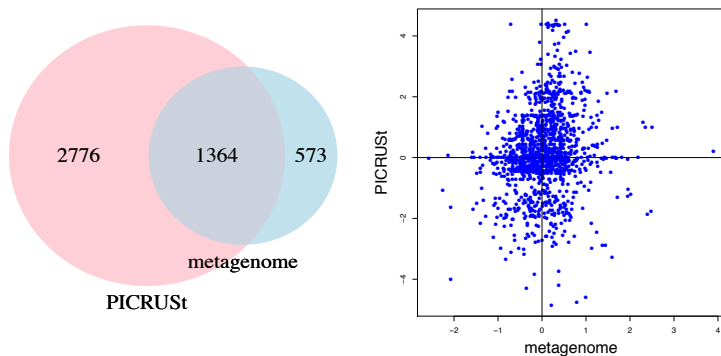

### Chicken

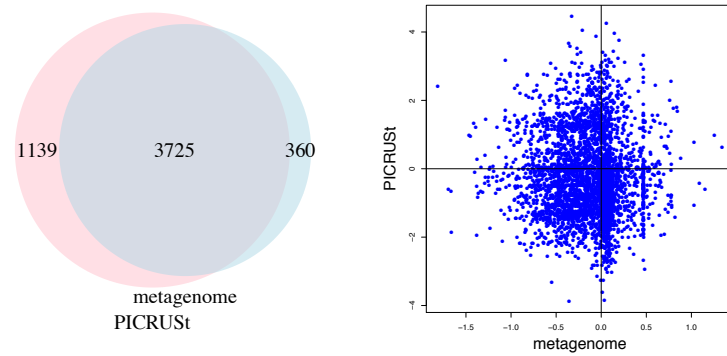

### Soil\_LWM

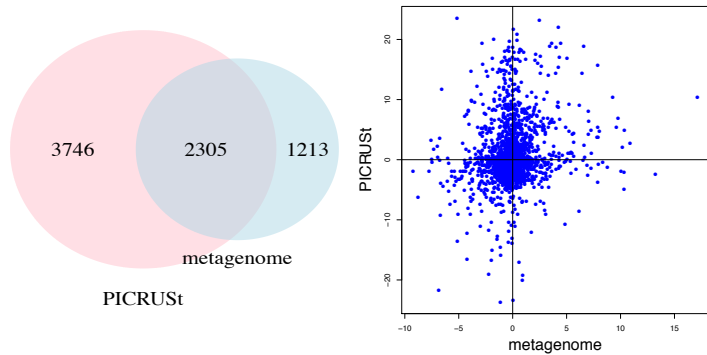

### Soil\_AAN

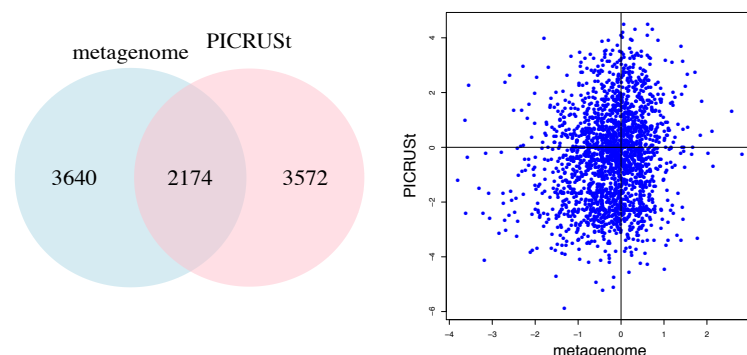

PICRUSt
  metagenome

| Dataset  | Percentage of genes not predicted by PICRUSt | Percentage of genes predicted but not in metagenome | Spearman's rho of transformed P-values |
|----------|----------------------------------------------|-----------------------------------------------------|----------------------------------------|
| Human_KW | 59.8%                                        | 0.68%                                               | 0.490 *                                |
| Human_TY | 13.9%                                        | 16.7%                                               | 0.554 *                                |
| Gorilla  | 7.60%                                        | 26.1%                                               | 0.313 *                                |
| Mouse    | 29.6%                                        | 67.1%                                               | 0.206 *                                |
| Chicken  | 8.81%                                        | 23.4%                                               | -0.0324                                |
| Soil_LWM | 34.5%                                        | 61.9%                                               | 0.125 *                                |
| Soil_AAN | 62.6%                                        | 62.2%                                               | 0.127 *                                |

bioRxiv preprint doi: <https://doi.org/10.1101/655746>; this version posted May 30, 2019. The copyright holder for this preprint (which was not certified by peer review) is the author/funder, who has granted bioRxiv a license to display the preprint in perpetuity. It is made available under aCC-BY-NC 4.0 International license.

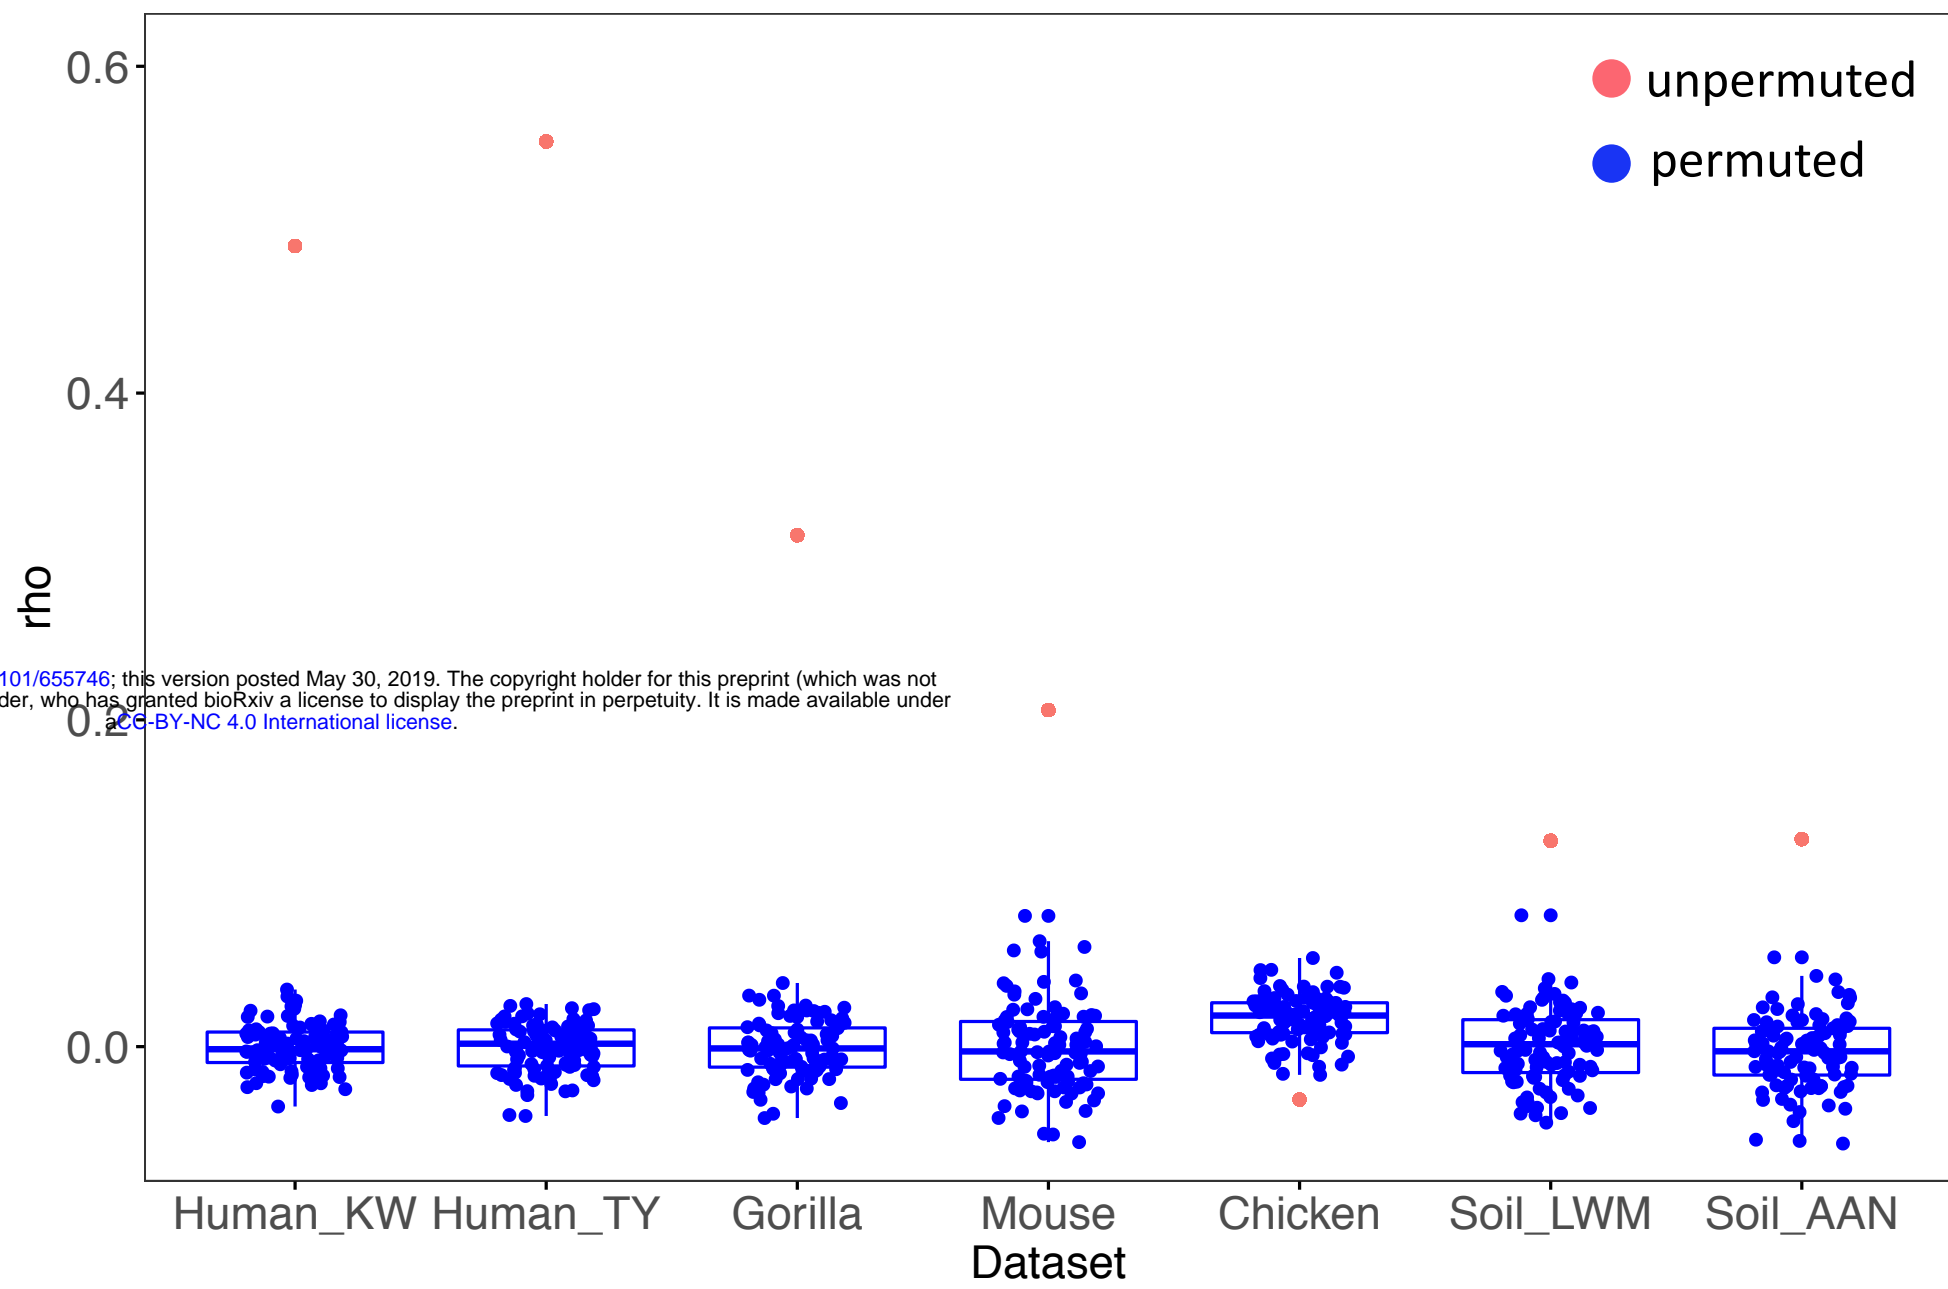

Mean of Spearman's rho (unpermuted)

0.490

0.554

0.313

0.206

-0.0324

0.125

0.127

Mean of Spearman's rho (permuted)

-0.000486

-0.000833

-0.00103

-0.000602

0.0178

0.000146

-0.00364

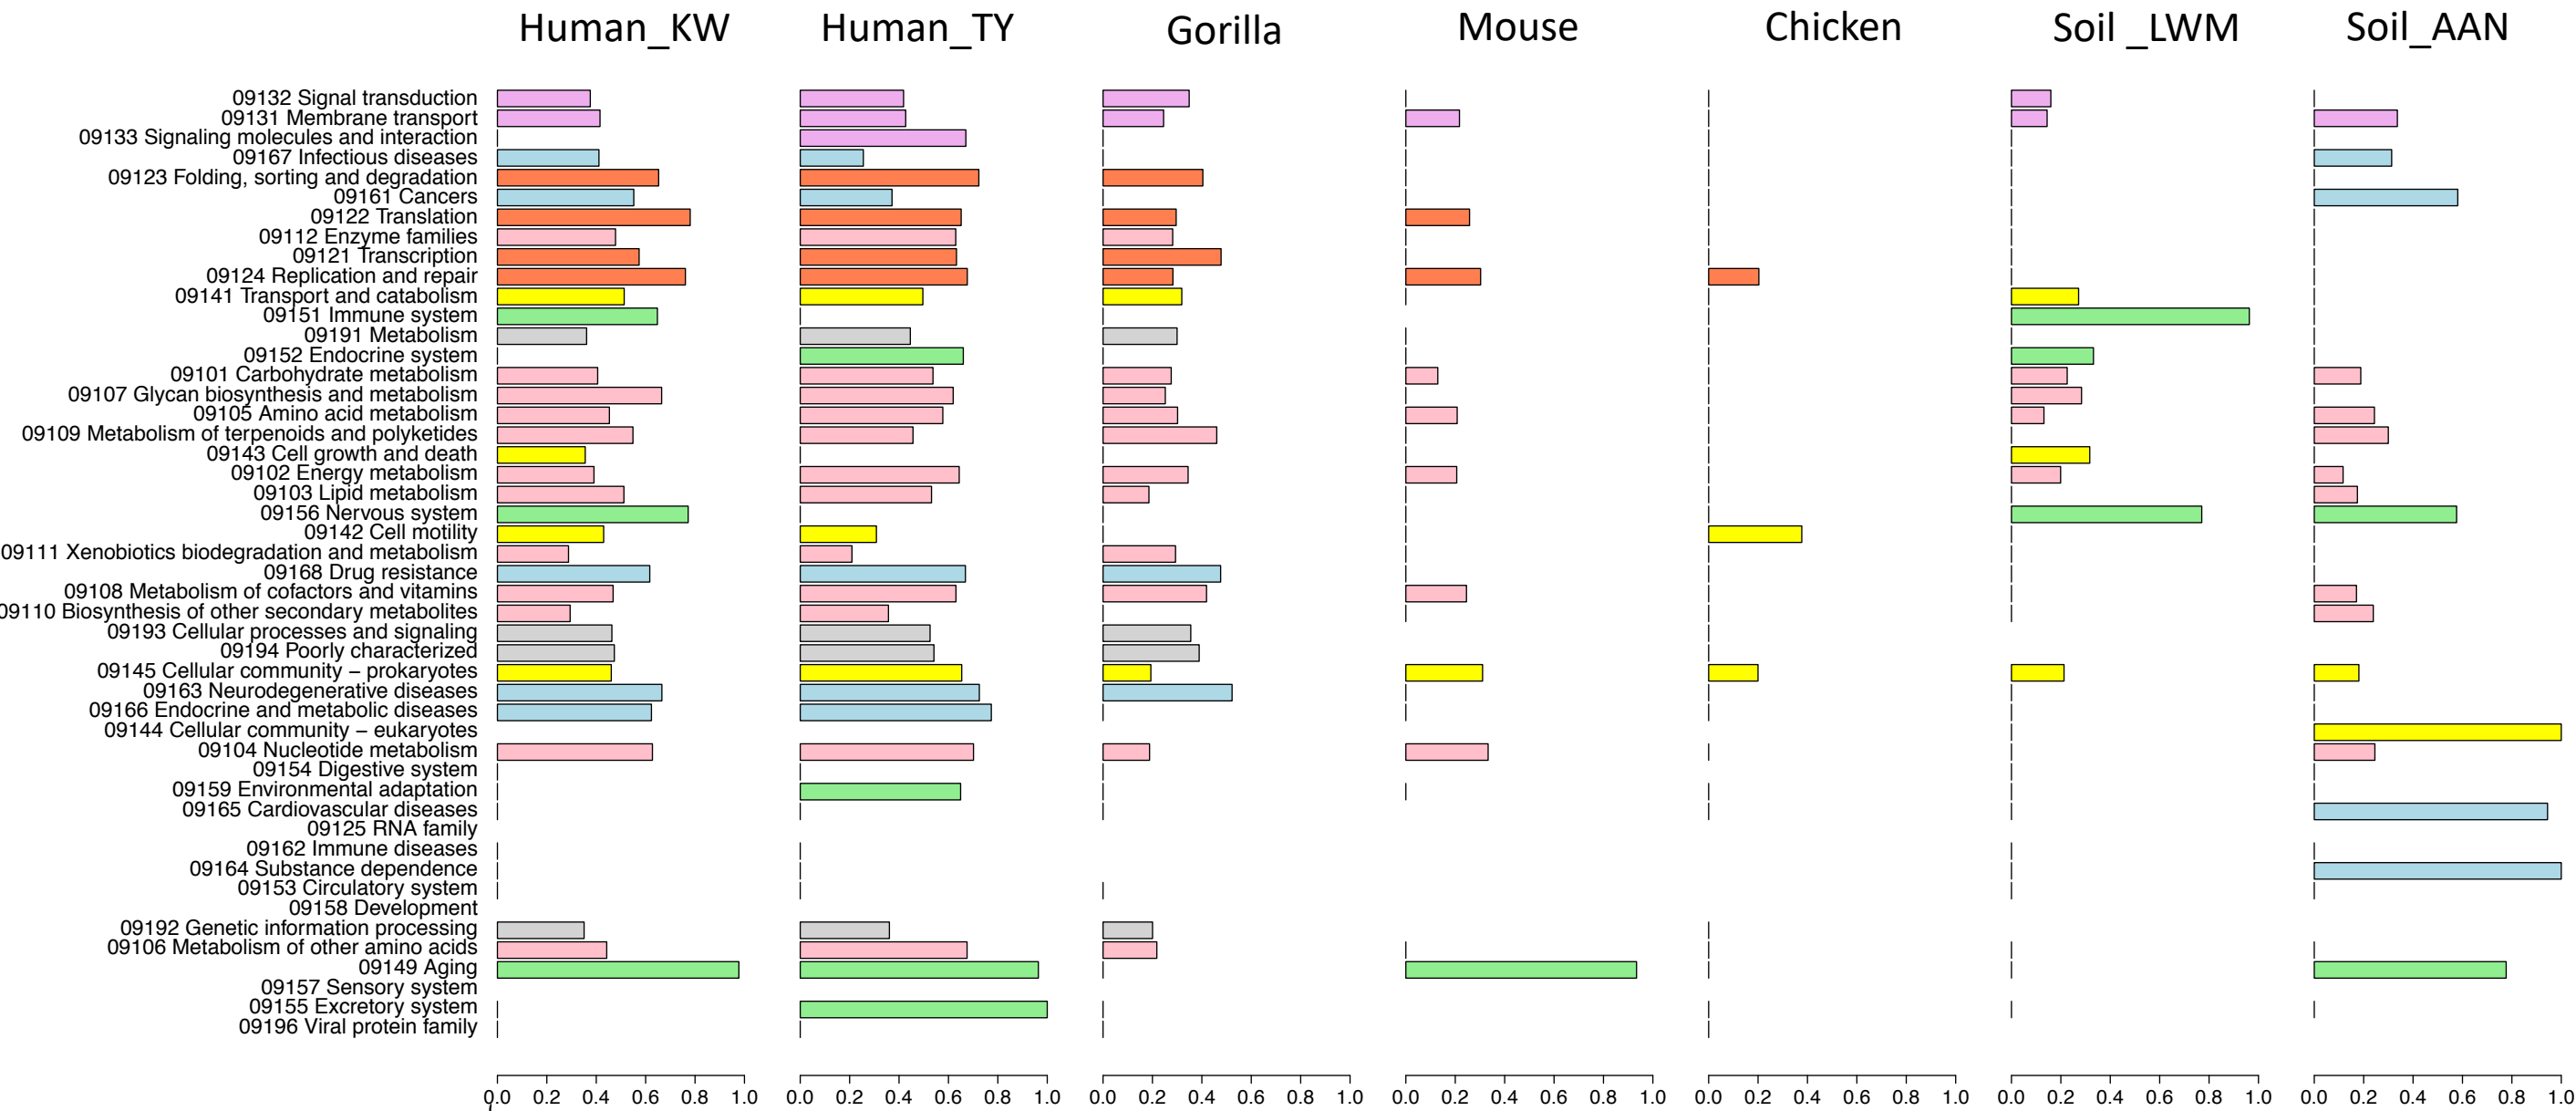

Spearman's rho

Metabolism Genetic Information Processing Environmental Information Processing Cellular Processes Organismal Systems Human Diseases Unclassified
